# Supplementary material
Source: MDPI journal article supplement (https://www.mdpi.com/2073-4344/12/11/1323)
Supplement: s1 [file s1]

Supplementary Materials

# Enhanced CO<sub>2</sub> Photoreduction over Bi<sub>2</sub>Te<sub>3</sub>/TiO<sub>2</sub> Nanocomposite via a Seebeck Effect

Yiming Lei <sup>1,2</sup>, Zewei Jia <sup>1,2</sup>, Huilin Hu <sup>1,2</sup>, Lequan Liu <sup>1,2</sup>, Jinhua Ye <sup>1,2,3</sup> and Defa Wang <sup>1,2,\*</sup>

<sup>1</sup> TJU-NIMS International Collaboration Laboratory, Key Laboratory of Advanced Ceramics and Machining Technology (Ministry of Education) and Tianjin Key Laboratory of Composite and Functional Materials, School of Material Science and Engineering, Tianjin University, Tianjin 300072, China

<sup>2</sup> Collaborative Innovation Centre of Chemical Science and Engineering (Tianjin), Tianjin 300072, China

<sup>3</sup> International Center for Materials Nanoarchitectonics (WPI-MANA), National Institute for Materials Science (NIMS), 1-1 Namiki, Tsukuba 305-0044, Japan

\* Correspondence: defawang@tju.edu.cn; Tel.: +86-22-27405065

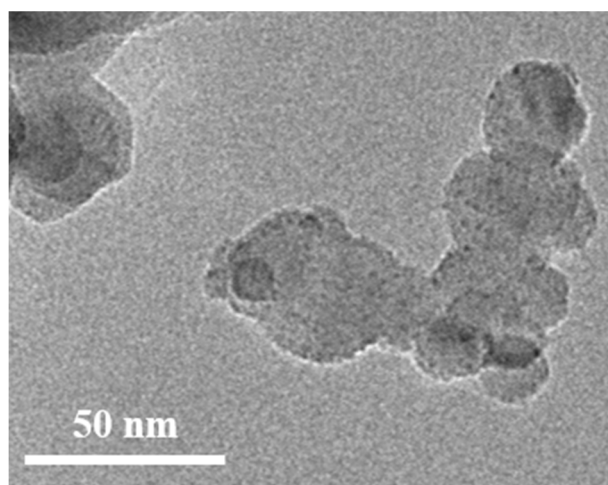

**Figure S1.** TEM image of pBT(2)/P25.

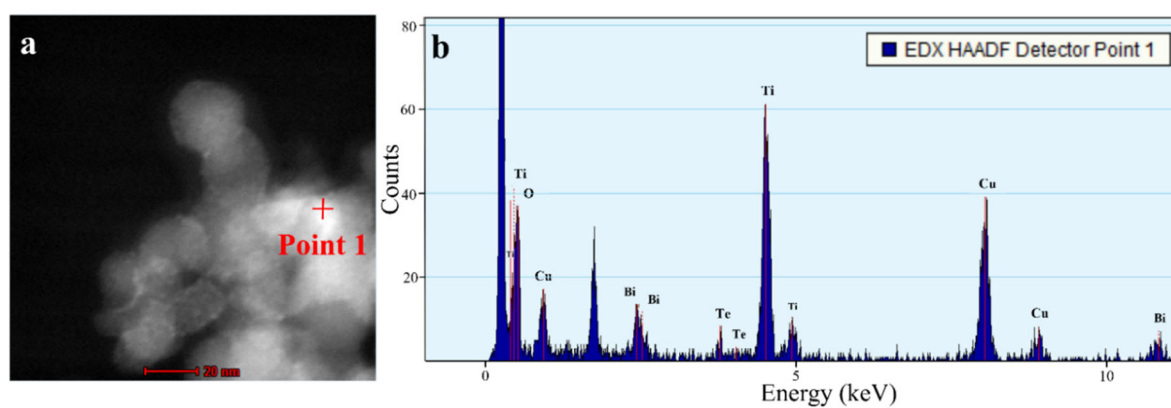

**Figure S2.** (a) High-angle annular dark-field (HAADF) TEM image, and (b) EDS analysis of pBT(2)/P25.

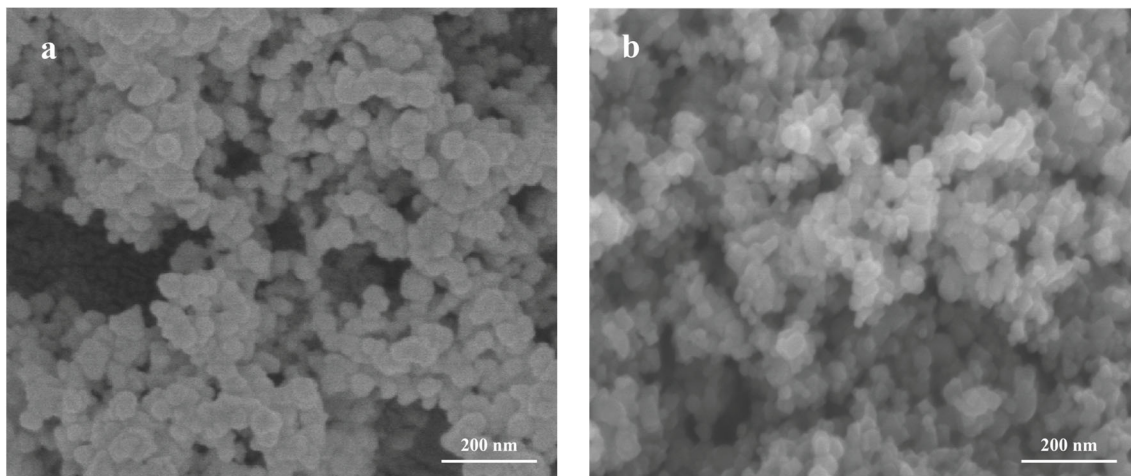

**Figure S3.** SEM images of (a) P25 and (b) pBT(2)/P25

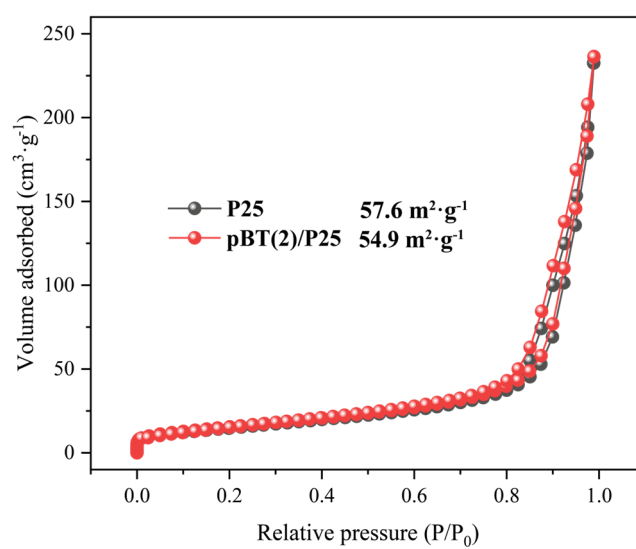

**Figure S4.**  $\text{N}_2$  sorption isotherms of P25 and pBT(2)/P25.

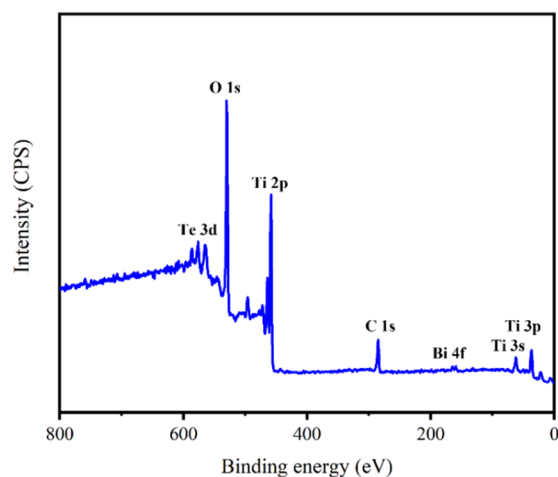

**Figure S5.** XPS survey spectra of pBT(2)/P25.

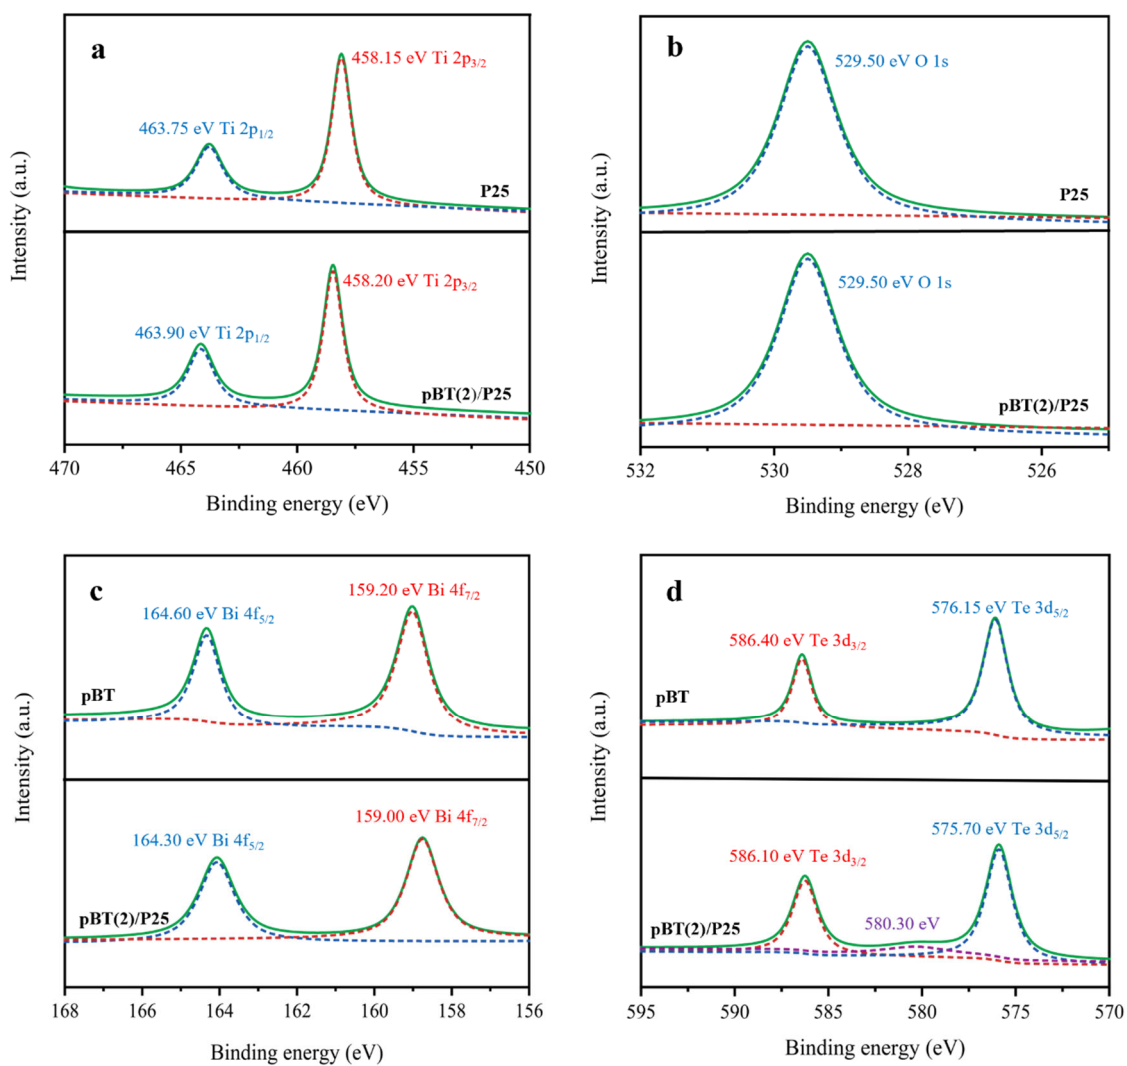

**Figure S6.** High-resolution XPS spectra of (a) Ti 2p, (b) O 1s in pure P25 and pBT(2)/P25; (c) Bi 4f, and (d) Te 3d in pure pBT and pBT(2)/P25.

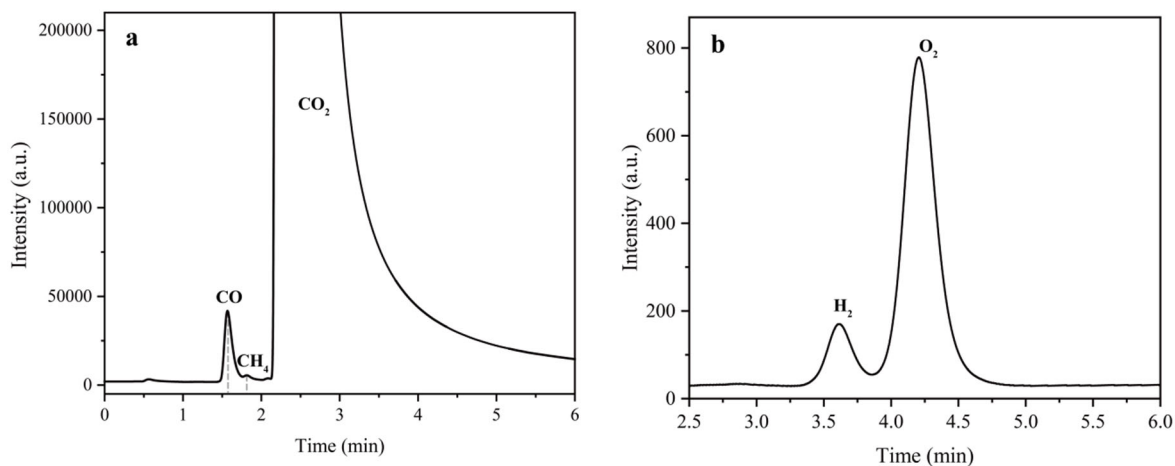

**Figure S7.** The typical GC spectra showing (a) the main product CO and a trace amount of CH<sub>4</sub> (note 1); (b) H<sub>2</sub> and O<sub>2</sub> in CO<sub>2</sub> photoreduction over pBT(2)/P25 (note 2).

**Note 1:** The gaseous sample (0.5 mL) was taken from the reaction vessel and analyzed on a gas chromatograph (GC-2014, Shimadzu, Japan) equipped with a flame ionization detector (FID) and methanizer for analysis of CO, CH<sub>4</sub>, and CO<sub>2</sub> using N<sub>2</sub> as the carrier gas.

**Note 2:** The evolved O<sub>2</sub> and H<sub>2</sub> were analyzed using an online gas chromatograph (GC-2014C, Shimadzu, Japan) equipped with a thermal conductivity detector (TCD) using Ar as the carrier gas.

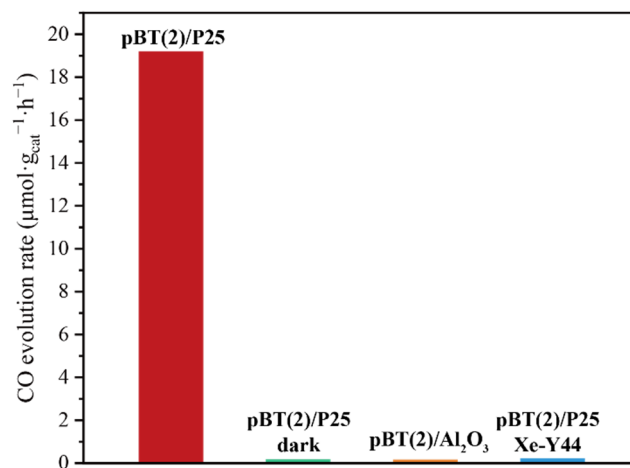

**Figure S8.** CO evolution rates over pBT(2)/P25 and pBT(2)/Al<sub>2</sub>O<sub>3</sub>.

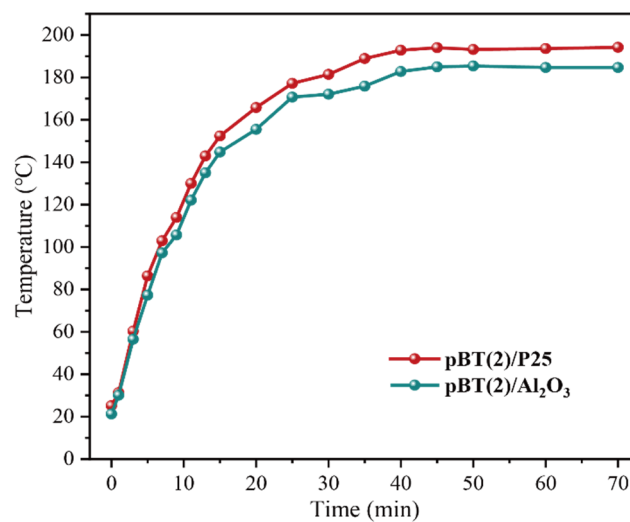

**Figure S9.** In-situ monitoring of the photothermal temperatures over pBT(2)/P25 and pBT(2)/Al<sub>2</sub>O<sub>3</sub> under a 300 W full-arc Xe lamp irradiation.

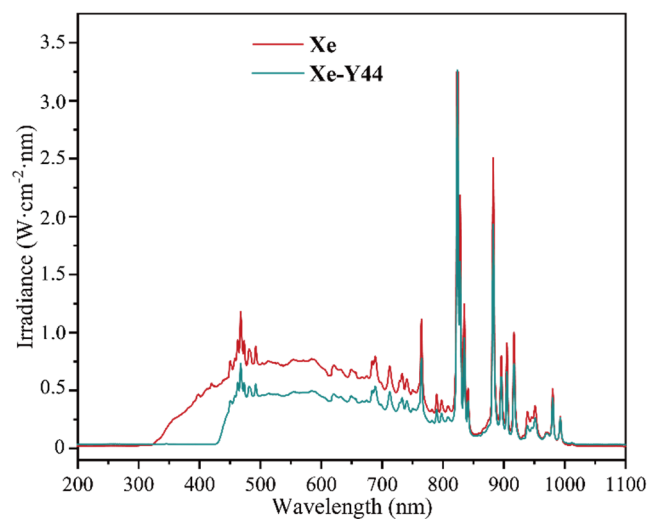

**Figure S10.** Light spectra of the full-arc Xe lamp and Xe lamp with a Y44 cutoff optical filter.

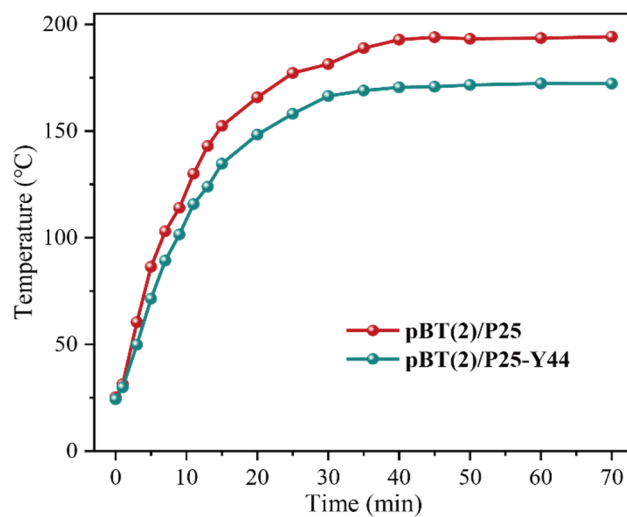

**Figure S11.** In-situ monitoring of the photothermal temperatures over pBT(2)/P25 under a 300 W full arc Xe lamp irradiation with and without a Y44 cutoff optical filter.

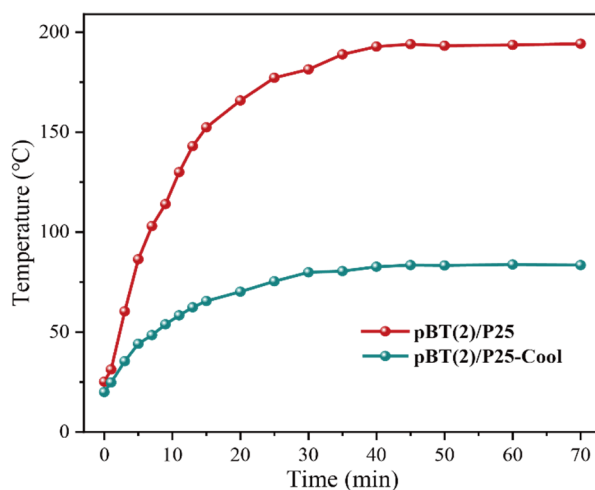

**Figure S12.** In-situ monitoring of the photothermal temperatures over pBT(2)/P25 under photothermal and cooling conditions. Photothermal condition: the reaction cell was irradiated by 300 W full-arc Xe lamp. Cooling condition: the reaction cell was placed in a basin containing cold water under Xe lamp irradiation.

**Table S1.** Temperatures over P25 and pBT(x)/P25 after CO<sub>2</sub> photoreduction under photothermal and cooling conditions.

|            | Photothermal condition (°C) | Cooling condition (°C) |
|------------|-----------------------------|------------------------|
| P25        | 129                         | 74                     |
| pBT(1)/P25 | 161                         | 79                     |
| pBT(2)/P25 | 191                         | 84                     |
| pBT(3)/P25 | 223                         | 86                     |
| pBT(4)/P25 | 255                         | 89                     |



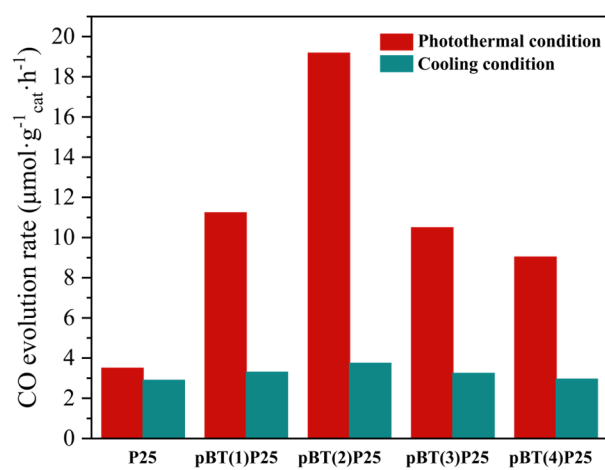

**Figure S13.** CO evolution rates over P25 and pBT(x)/P25 under photothermal and cooling conditions.

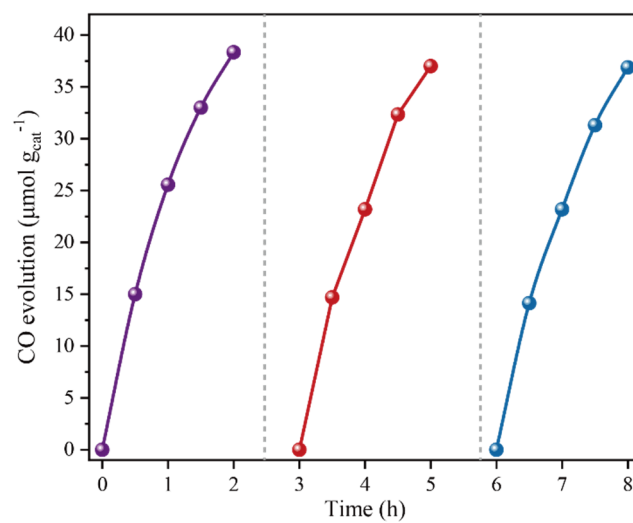

**Figure S14.** Three cycles of CO<sub>2</sub> photoreduction over pBT(2)/P25.

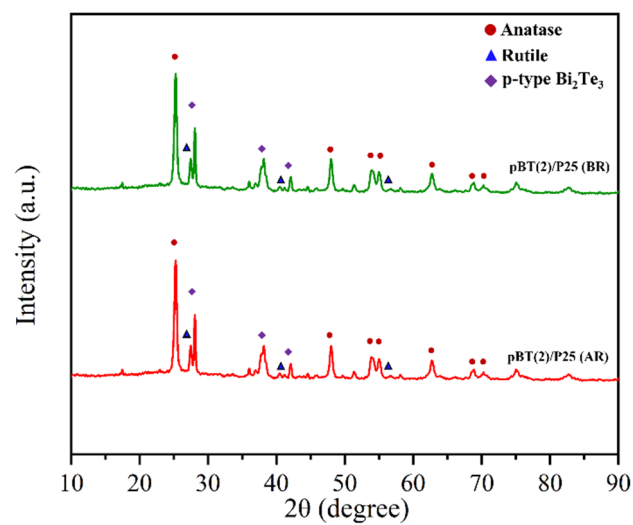

**Figure S15.** XRD patterns of pBT(2)/P25 before reaction (BR) and after reaction (AR).

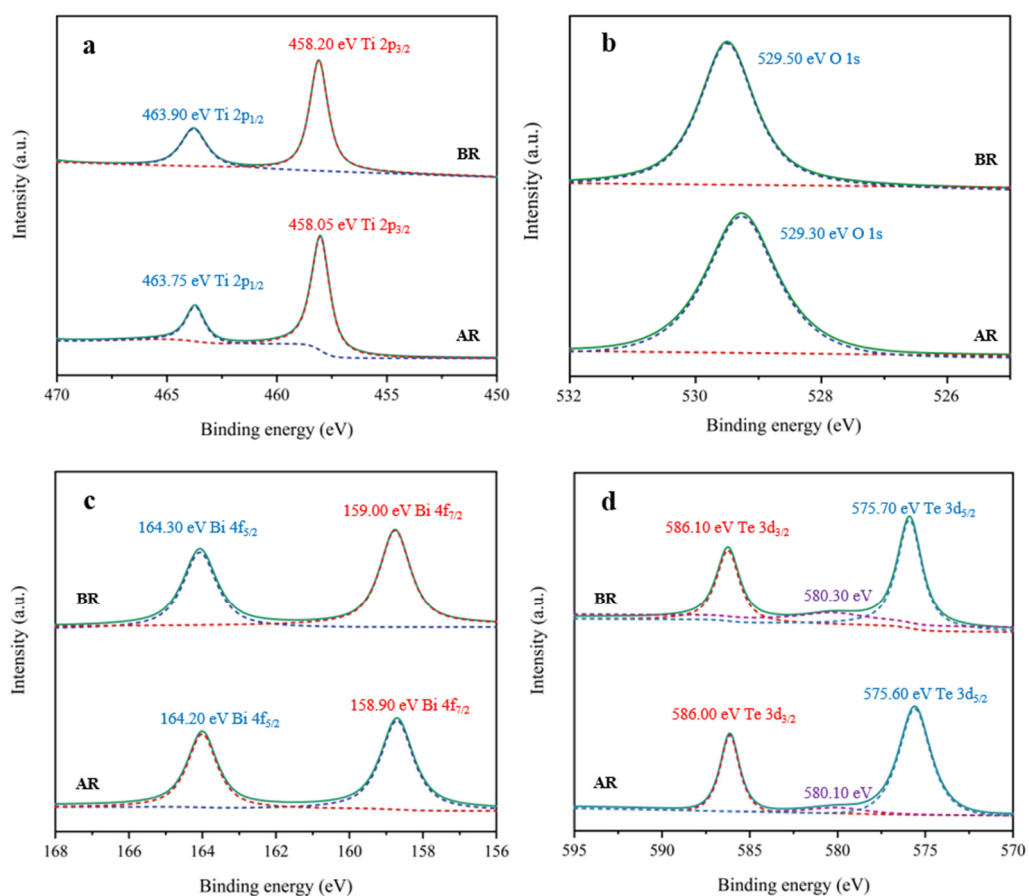

**Figure S16.** High-resolution XPS spectra of (a) Ti 2p, (b) O 1s, (c) Bi 4f, and (d) Te 3d in pBT(2)/P25 before and after reaction cycles (denoted as BR and AR).

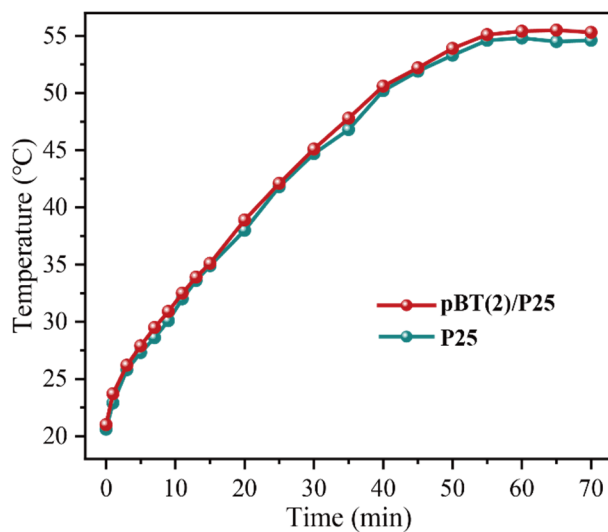

**Figure S17.** In-situ monitoring of the surface temperatures of P25 and pBT(2)/P25 photoanodes immersed in  $\text{K}_2\text{SO}_4$  electrolyte during PEC measurement under a 300 W full-arc Xe lamp irradiation.

**Table S2.** Surface temperatures of P25 and pBT(x)/P25 photoanodes in  $\text{K}_2\text{SO}_4$  electrolyte

|            | CO <sub>2</sub> reduction (°C) | PEC measurments (°C) |
|------------|--------------------------------|----------------------|
| P25        | 129                            | 54                   |
| pBT(1)/P25 | 161                            | 54                   |
| pBT(2)/P25 | 191                            | 55                   |
| pBT(3)/P25 | 223                            | 55                   |
| pBT(4)/P25 | 255                            | 55                   |

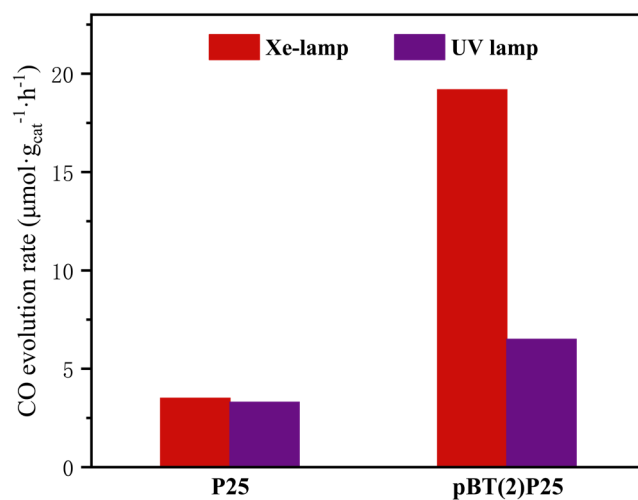

**Figure S18.** CO evolution rates over P25 and pBT(x)/P25 under Xe lamp and UV lamp irradiation.

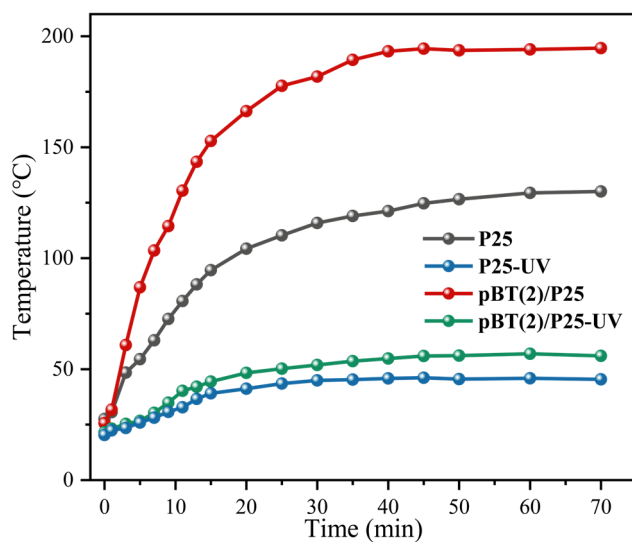

**Figure S19.** In-situ monitoring of the photothermal temperatures over P25 and pBT(2)/P25 under Xe lamp and UV lamp (denoted as P25-UV and pBT(2)/P25-UV) irradiation.

**Table S3** Comparison of CO<sub>2</sub> photoreduction performance over various TiO<sub>2</sub>-based photocatalysts

| Photocatalyst                                                                   | Reaction condition                                                                                                              | Light source                         | CO <sub>2</sub> reduction product evolution rate                                                                                                                    | Reference                                              |
|---------------------------------------------------------------------------------|---------------------------------------------------------------------------------------------------------------------------------|--------------------------------------|---------------------------------------------------------------------------------------------------------------------------------------------------------------------|--------------------------------------------------------|
| pBT/P25                                                                         | 50 mg catalysts, 3 ml H <sub>2</sub> O, and CO <sub>2</sub>                                                                     | 300 W Xe-lamp                        | CO: 19.2 $\mu\text{mol}\cdot\text{g}_{\text{cat}}^{-1}\cdot\text{h}^{-1}$<br>CH <sub>4</sub> : 0.4 $\mu\text{mol}\cdot\text{g}_{\text{cat}}^{-1}\cdot\text{h}^{-1}$ | This work                                              |
| W-doped TiO <sub>2</sub>                                                        | 50 mg catalysts, 2 ml H <sub>2</sub> O, and CO <sub>2</sub>                                                                     | 150 W UV-lamp                        | CO: 0.056 $\mu\text{mol}\cdot\text{g}_{\text{cat}}^{-1}\cdot\text{h}^{-1}$                                                                                          | <i>Nanoscale</i> <b>2020</b> , 12, 17245-17252.        |
| Ag/TiO <sub>2</sub>                                                             | 50 mg catalysts, 40 ml H <sub>2</sub> O, and CO <sub>2</sub>                                                                    | 300 W Xe-lamp                        | CO: 0.575 $\mu\text{mol}\cdot\text{g}_{\text{cat}}^{-1}\cdot\text{h}^{-1}$                                                                                          | <i>Chem. Eng. J.</i> <b>2021</b> , 410, 128397.        |
| Ag/TiO <sub>2</sub> -Zeolite TS-1                                               | 7 mg catalysts, 1 ml H <sub>2</sub> O, and CO <sub>2</sub>                                                                      | 300 W Xe-lamp                        | CO: 8.1 $\mu\text{mol}\cdot\text{g}_{\text{cat}}^{-1}\cdot\text{h}^{-1}$<br>CH <sub>4</sub> : 1.7 $\mu\text{mol}\cdot\text{g}_{\text{cat}}^{-1}\cdot\text{h}^{-1}$  | <i>J Hazard. Mater.</i> <b>2021</b> , 403, 124019      |
| F-TiO <sub>2-x</sub>                                                            | 50 mg catalysts, 1 ml H <sub>2</sub> O, and CO <sub>2</sub>                                                                     | 300 W Xe-lamp, AM 1.5 optical filter | CO: 6.5 $\mu\text{mol}\cdot\text{g}_{\text{cat}}^{-1}\cdot\text{h}^{-1}$<br>CH <sub>4</sub> : 4.3 $\mu\text{mol}\cdot\text{g}_{\text{cat}}^{-1}\cdot\text{h}^{-1}$  | <i>Nano Letters</i> <b>2018</b> , 18, 3384-3390.       |
| Mo/TiO <sub>2</sub>                                                             | 100 mg catalysts, 20 $\mu\text{l}$ H <sub>2</sub> O, and 20 ml CO <sub>2</sub>                                                  | 300 W Xe-lamp                        | CO: 0.3 $\mu\text{mol}\cdot\text{g}_{\text{cat}}^{-1}\cdot\text{h}^{-1}$<br>CH <sub>4</sub> : 0.2 $\mu\text{mol}\cdot\text{g}_{\text{cat}}^{-1}\cdot\text{h}^{-1}$  | <i>J. CO<sub>2</sub> Util.</i> <b>2020</b> , 38, 1-9.  |
| Au/TiO <sub>2</sub> /BiVO <sub>4</sub>                                          | 200 mg catalysts, 10 ml H <sub>2</sub> O, and CO <sub>2</sub>                                                                   | 300 W Xe-lamp                        | CO: 2.5 $\mu\text{mol}\cdot\text{g}_{\text{cat}}^{-1}\cdot\text{h}^{-1}$<br>CH <sub>4</sub> : 7.5 $\mu\text{mol}\cdot\text{g}_{\text{cat}}^{-1}\cdot\text{h}^{-1}$  | <i>J. Mater. Chem. A</i> <b>2018</b> , 6, 11838-11845. |
| TiO <sub>2</sub> /CsPbBr <sub>3</sub>                                           | 10 mg catalysts, 30 mL acetonitrile+100 $\mu\text{L}$ H <sub>2</sub> O, and CO <sub>2</sub>                                     | 300 W Xe-lamp                        | CO: 4.0 $\mu\text{mol}\cdot\text{g}_{\text{cat}}^{-1}\cdot\text{h}^{-1}$                                                                                            | <i>Nat. Commun.</i> <b>2020</b> , 11, 4613.            |
| TiO <sub>2</sub> /C <sub>3</sub> N <sub>4</sub> /Ti <sub>3</sub> C <sub>2</sub> | 30 mg catalysts, 0.84 mg NaHCO <sub>3</sub> , 0.3 mL 2 mol L <sup>-1</sup> H <sub>2</sub> SO <sub>4</sub> , and CO <sub>2</sub> | 350 W Xe-lamp                        | CO: 4.4 $\mu\text{mol}\cdot\text{g}_{\text{cat}}^{-1}\cdot\text{h}^{-1}$<br>CH <sub>4</sub> : 1.2 $\mu\text{mol}\cdot\text{g}_{\text{cat}}^{-1}\cdot\text{h}^{-1}$  | <i>Appl. Catal. B</i> <b>2020</b> , 272, 119006.       |

## References

1. Li, Y.; Walsh, A. G.; Li, D.; Do, D.; Ma, H.; Wang, C.; Zhang, P.; Zhang, X. W-Doped TiO<sub>2</sub> for photothermocatalytic CO<sub>2</sub> reduction. *Nanoscale* **2020**, *12*, 17245-17252.
2. Li, G.; Sun, Y.; Zhang, Q.; Gao, Z.; Sun, W.; Zhou, X. Ag quantum dots modified hierarchically porous and defective TiO<sub>2</sub> nanoparticles for improved photocatalytic CO<sub>2</sub> reduction. *Chem. Eng. J.* **2021**, *410*, 128397.
3. Sun, Y.; Li, G.; Gong, Y.; Sun, Z.; Yao, H.; Zhou, X. Ag and TiO<sub>2</sub> nanoparticles co-modified defective zeolite TS-1 for improved photocatalytic CO<sub>2</sub> reduction. *J Hazard. Mater.* **2021**, *403*, 124019.
4. Xing, M.; Zhou, Y.; Dong, C.; Cai, L.; Zeng, L.; Shen, B.; Pan, L.; Dong, C.; Chai, Y.; Zhang, J.; Yin, Y. Modulation of the reduction potential of TiO<sub>2-x</sub> by fluorination for efficient and selective CH<sub>4</sub> generation from CO<sub>2</sub> photoreduction. *Nano Letters* **2018**, *18*, 3384-3390.
5. Feng, S.; Zhao, J.; Bai, Y.; Liang, X.; Wang, T.; Wang, C. Facile synthesis of Mo-doped TiO<sub>2</sub> for selective photocatalytic CO<sub>2</sub> reduction to methane: promoted H<sub>2</sub>O dissociation by Mo doping. *J. CO<sub>2</sub> Util.* **2020**, *38*, 1-9.
6. Bian, J.; Qu, Y.; Zhang, X.; Sun, N.; Tang, D.; Jing, L. Dimension-matched plasmonic Au/TiO<sub>2</sub>/BiVO<sub>4</sub> nanocomposites as efficient wide-visible-light photocatalysts to convert CO<sub>2</sub> and mechanistic insights. *J. Mater. Chem. A* **2018**, *6*, 11838-11845.
7. Xu, F.; Meng, K.; Cheng, B.; Wang, S.; Xu, J.; Yu, J. Unique S-scheme heterojunctions in self-assembled TiO<sub>2</sub>/CsPbBr<sub>3</sub> hybrids for CO<sub>2</sub> photoreduction. *Nat. Commun.* **2020**, *11*, 4613.
8. He, F.; Zhu, B.; Cheng, B.; Yu, J.; Ho, W.; Macyk, W. 2D/2D/0D TiO<sub>2</sub>/C<sub>3</sub>N<sub>4</sub>/Ti<sub>3</sub>C<sub>2</sub> MXene composite S-scheme photocatalyst with enhanced CO<sub>2</sub> reduction activity. *Appl. Catal. B* **2020**, *272*, 119006.
